# Supplementary material for: LncRNA AOC4P impacts the differentiation of macrophages and T-lymphocyte by regulating the NF-κB pathways of KGN cells: potential pathogenesis of polycystic ovary syndrome
Source: Research Square preprint supplement (doi:10.21203/rs.3.rs-1769600/v2), 2022-07-11
Supplement: Supplementary file 1 [file 7d20d0944ff80d16ad88c867.docx]

Table S1: The sequences of the primers for qRT-PCR.

| Gene | Primer sequence (5′ to 3′) |
| --- | --- |
| AOC4P | F：TGAGGCAGGAGAATCACTTGA |
| R：TTCAGTCACGCAGGATGGA |
| GAPDH | F：GGTGAAGGTCGGTGTGAACG |
| R：CTCGCTCCTGGAAGATGGTG |
| IL-6 | F：AATAACCACCCCTGACCCAAC |
| R：ACATTTGCCGAAGAGCCCT |
| TNF-α | F：TCTCGAACCCCGAGTGACAA |
| R：TGAAGAGGACCTGGGAGTAG |
| CXCL16 | F：GACATGCTTACTCGGGGATTG |
| R：GGACAGTGATCCTACTGGGAG |
| IL-1β | F：AGCTACGAATCTCCGACCAC |
| R：CGTTATCCCATGTGTCGAAGAA |
| IL-18 | F：AACAAACTATTTGTCGCAGGAAT |
| R：TGCCACAAAGTTGATGCAAT |
| IL-4 | F：:CGGCAACTTTGTCCACGGA |
| R：TCTGTTACGGTCAACTCGGTG |
| CXCL2 | F：CACACTCAAGAATGGGCAGA |
| R：CTTCAGGAACAGCCACCAAT |
| TGF-β | F：GACTCGCCAGAGTGGTTATCT |
| R：CGGTAGTGAACCCGTTGAT |
| CCL17 | F：GAGCCATTCCCCTTAGAAAG |
| R：AGGCTTCAAGACCTCTCAAG |
